# Supplementary material for: Epigenetic Silencing of THY1 Tracks the Acquisition of the Notch1–EGFR Signaling in a Xenograft Model of CD44+/CD24low/CD90+ Myoepithelial Cells
Source: Oxford University Press journal article supplement (doi:10.1158/1541-7786.mcr-17-0324), 2018-09-21

# Supplemental Figure S2

## Steps of isolation of Thy1-positive cells

Breast Tumor  
specimen

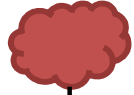

Primary culture

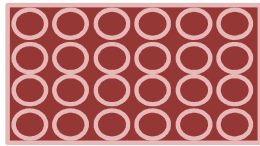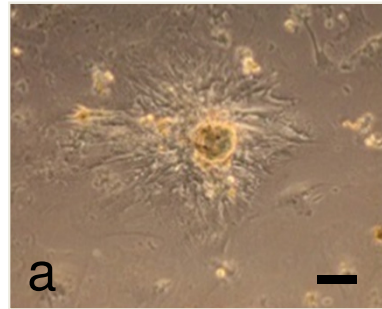

CD44<sup>+</sup>/CD24<sup>low</sup>  
sorting

Long-term culture

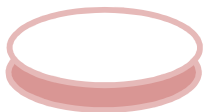

Mammospheres in  
low-attach

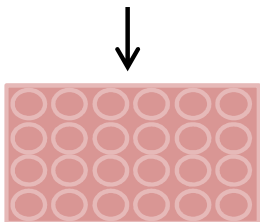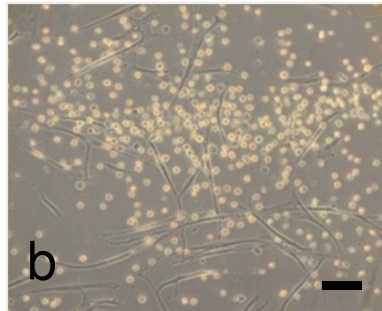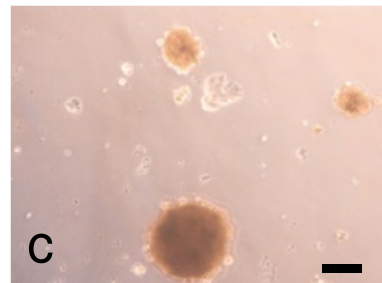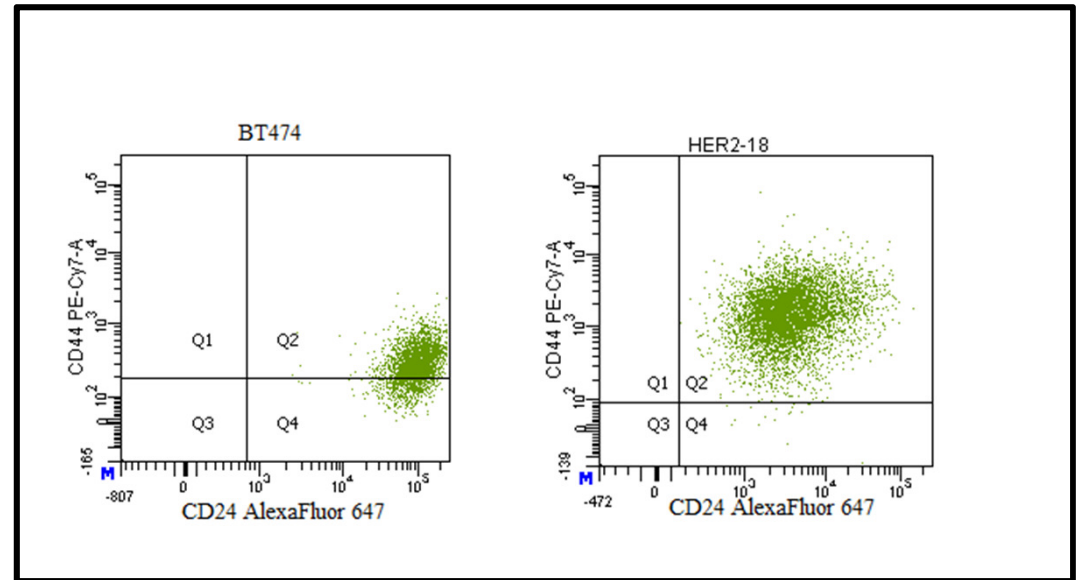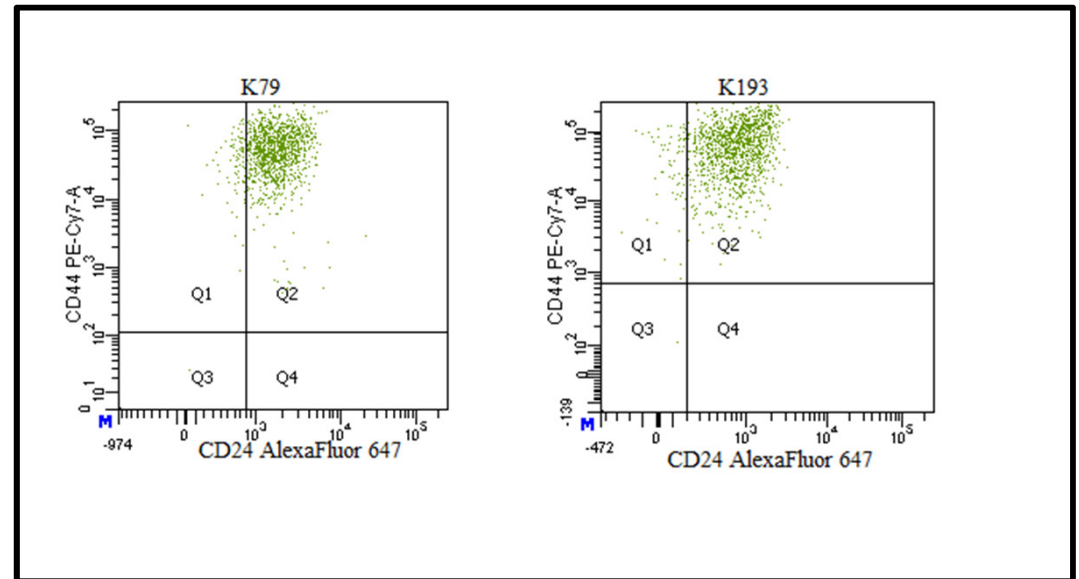

Supplement: 15417786mcr170324-sup-185190_4_supp_5011417_p5lnm0.pdf [file 15417786mcr170324-sup-185190_4_supp_5011417_p5lnm0.pdf]
