# Supplementary material for: Epigenetic Silencing of THY1 Tracks the Acquisition of the Notch1–EGFR Signaling in a Xenograft Model of CD44+/CD24low/CD90+ Myoepithelial Cells
Source: Oxford University Press journal article supplement (doi:10.1158/1541-7786.mcr-17-0324), 2018-09-21
Supplement: 15417786mcr170324-sup-185190_4_supp_5011421_pslnm0.pdf [file 15417786mcr170324-sup-185190_4_supp_5011421_pslnm0.pdf]

## Supplemental Figure S7

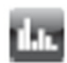

### THY1 Expression in Sorlie Breast 2

Grouped by Cancer Sample Site (Breast Cancer)

#### Sorlie Breast 2 Statistics

Reporter: IMAGE:769686 ▼

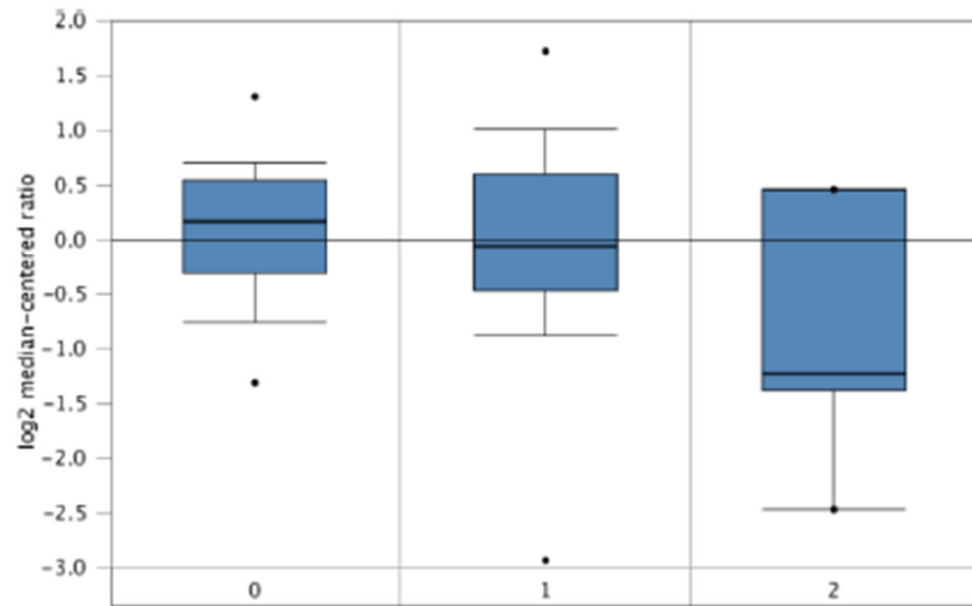

#### Legend

0. No value (45)

1. Primary Site (107)

2. Metastasis (5)
