# Supplementary figures and images for: Epigenetic Silencing of THY1 Tracks the Acquisition of the Notch1–EGFR Signaling in a Xenograft Model of CD44+/CD24low/CD90+ Myoepithelial Cells
Source: Oxford University Press journal article supplement (doi:10.1158/1541-7786.mcr-17-0324), 2018-09-21

# Supplemental Figure S6

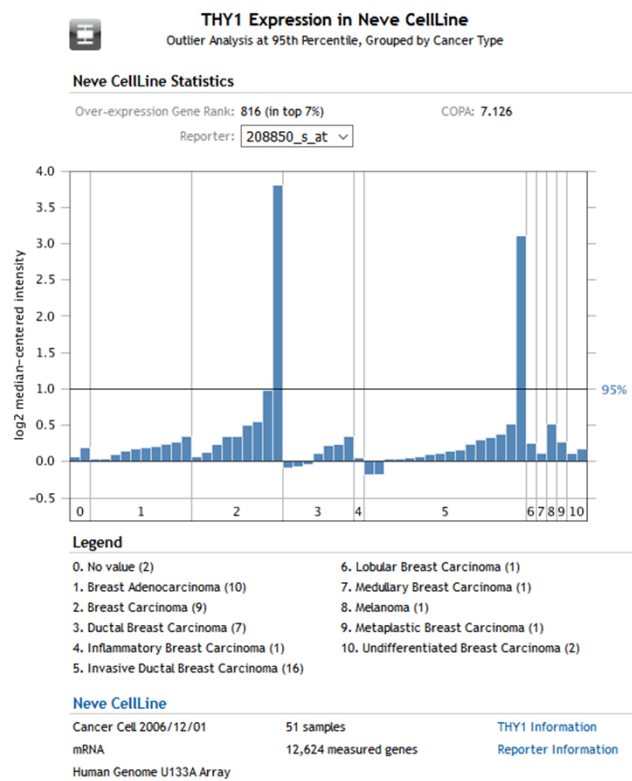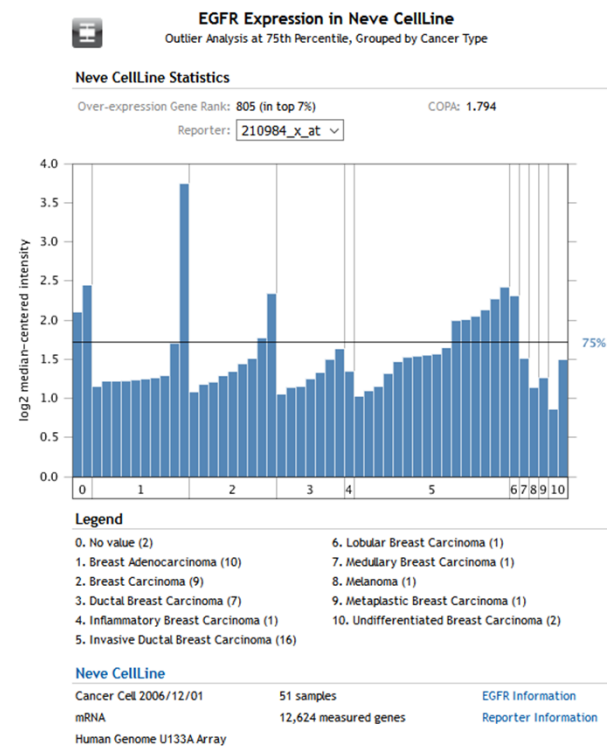

Supplement: 15417786mcr170324-sup-185190_4_supp_5011409_pblnm0.pdf [file 15417786mcr170324-sup-185190_4_supp_5011409_pblnm0.pdf]
